# Supplementary material for: Austalide derivative from marine-derived Aspergillus sp. and evaluation of its cytotoxic and ADME/TOPKAT properties
Source: Royal Society of Chemistry journal article supplement (doi:10.1039/d3ra02632a), 2023-01-01
Supplement: d3ra02632a1.pdf [file d3ra02632a1.pdf]

## Supporting information

### **An austalide derivative from the marine-derived *Aspergillus* *sp.* and evaluation of its cytotoxic and ADME/TOPKAT properties**

Mohamed S. Elnaggar<sup>a,c#</sup>, Ahmed M. Elissawy<sup>a,b,#\*</sup>, Fadia S. Youssef<sup>a</sup>, Máté Kicsák<sup>d</sup>, Tibor Kurtán<sup>d</sup>, Abdel Nasser B. Singab<sup>a,b\*</sup>, and Rainer Kalscheuer<sup>c</sup>

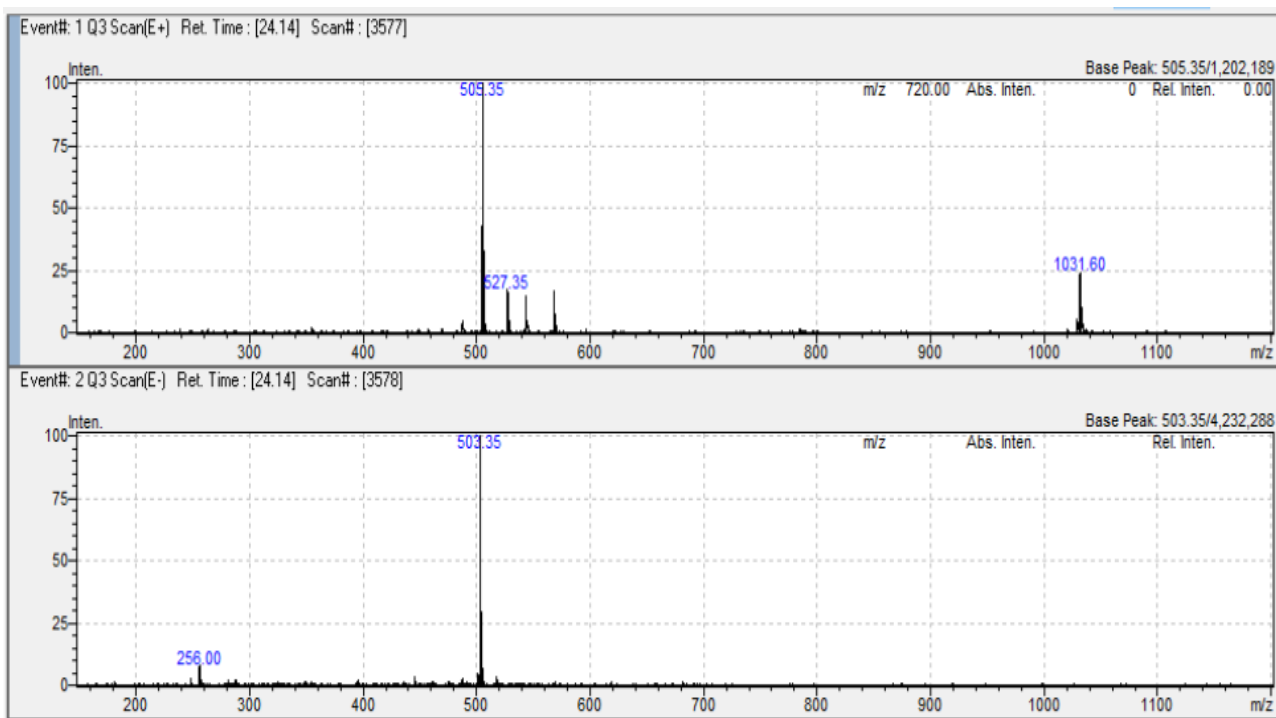

**S1A. Low resolution +ve/-ve ESIMS of compound 1**

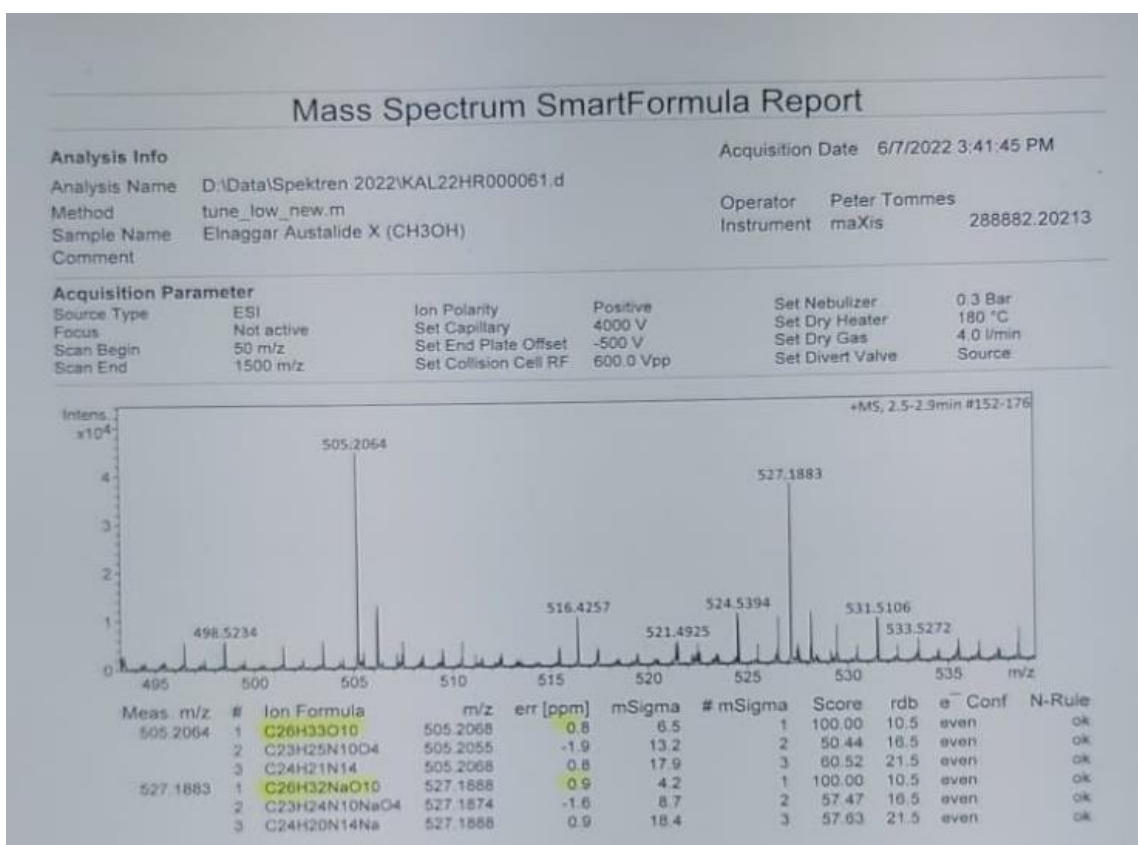

**S1B. High-resolution +ve ESIMS of compound 1**

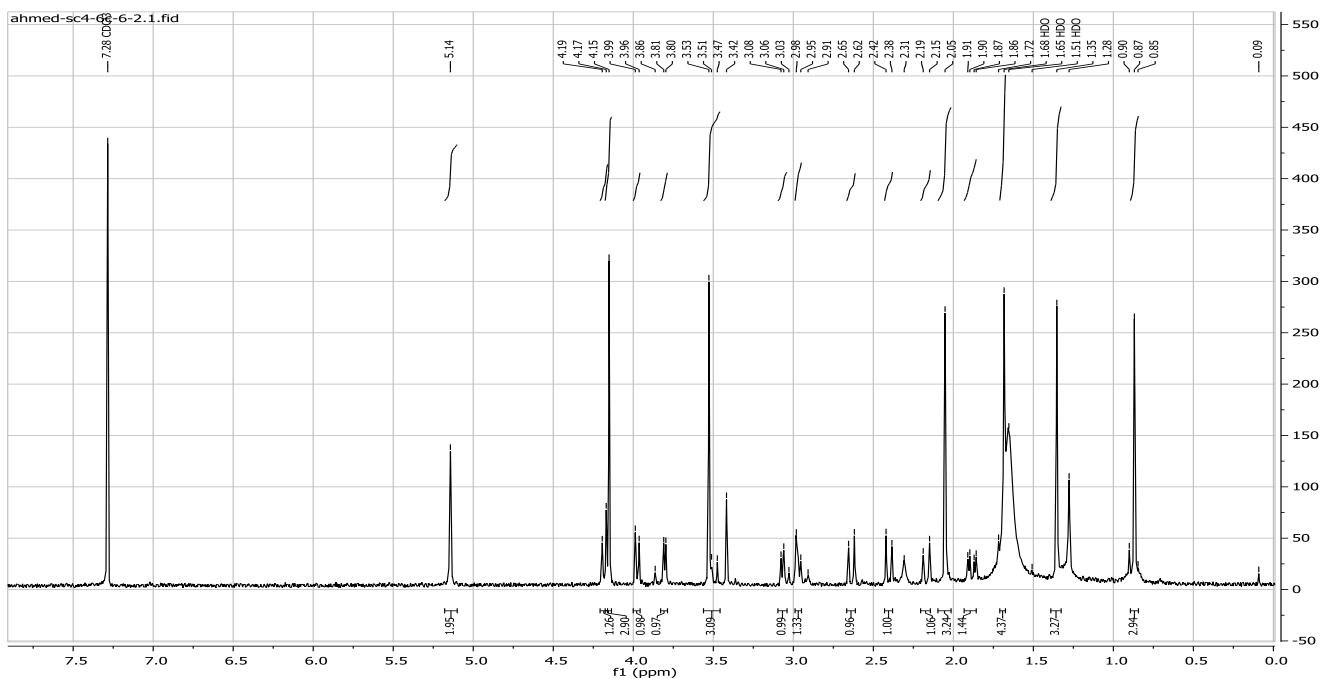

S2. <sup>1</sup>H NMR spectrum of compound 1

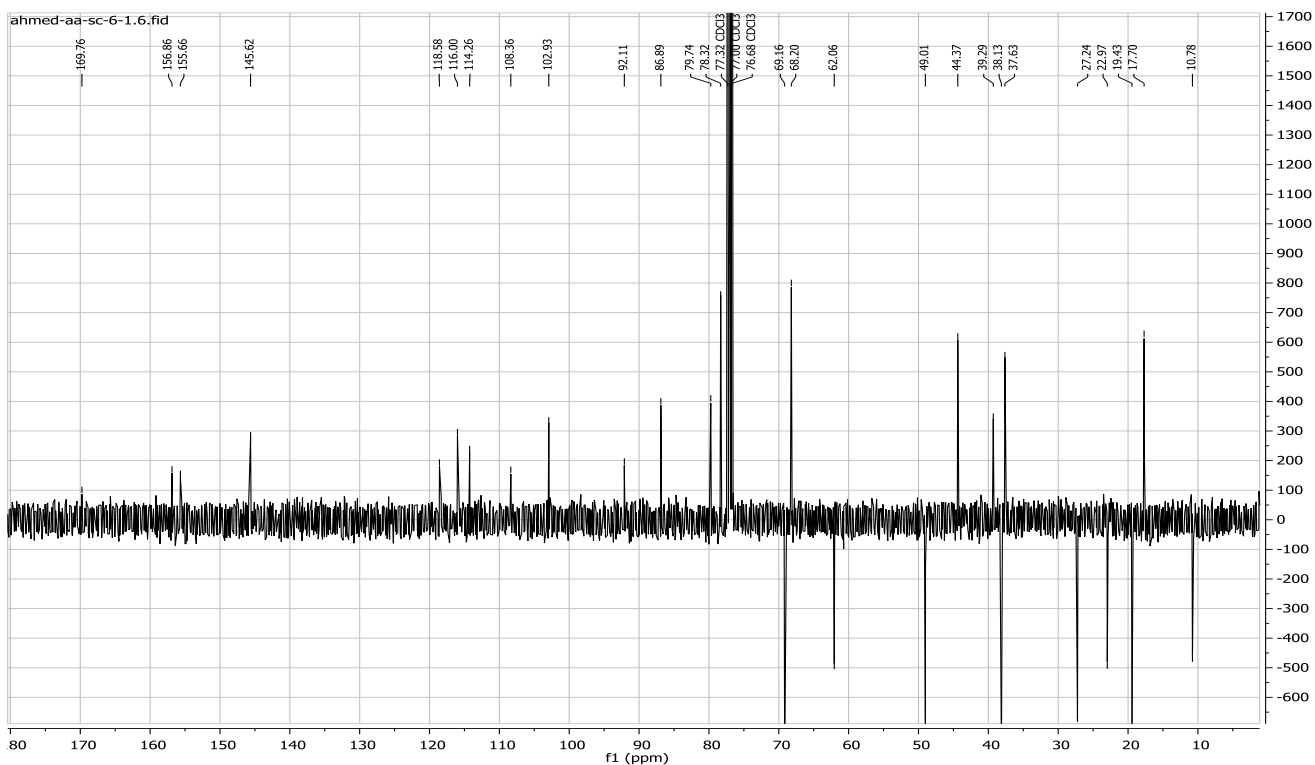

S3. APT NMR spectrum of compound 1

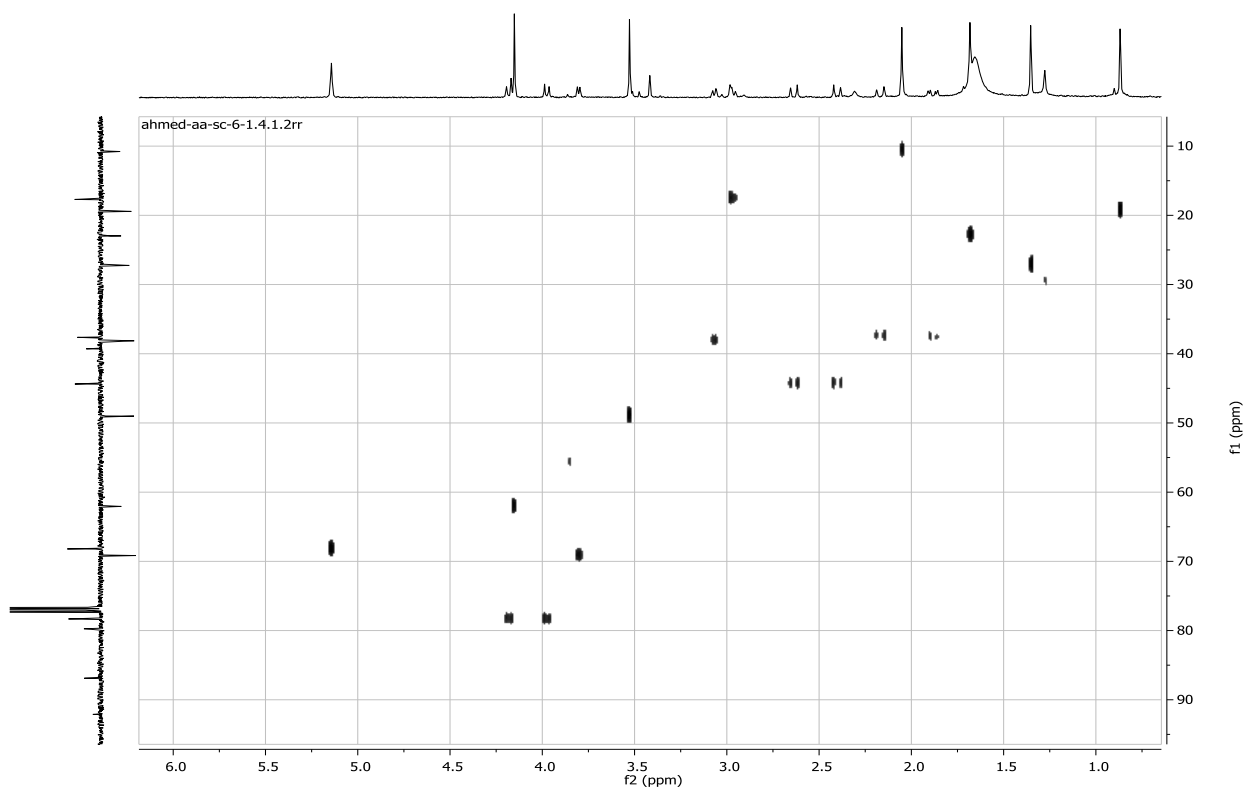

**S4. HSQC spectrum of compound 1**

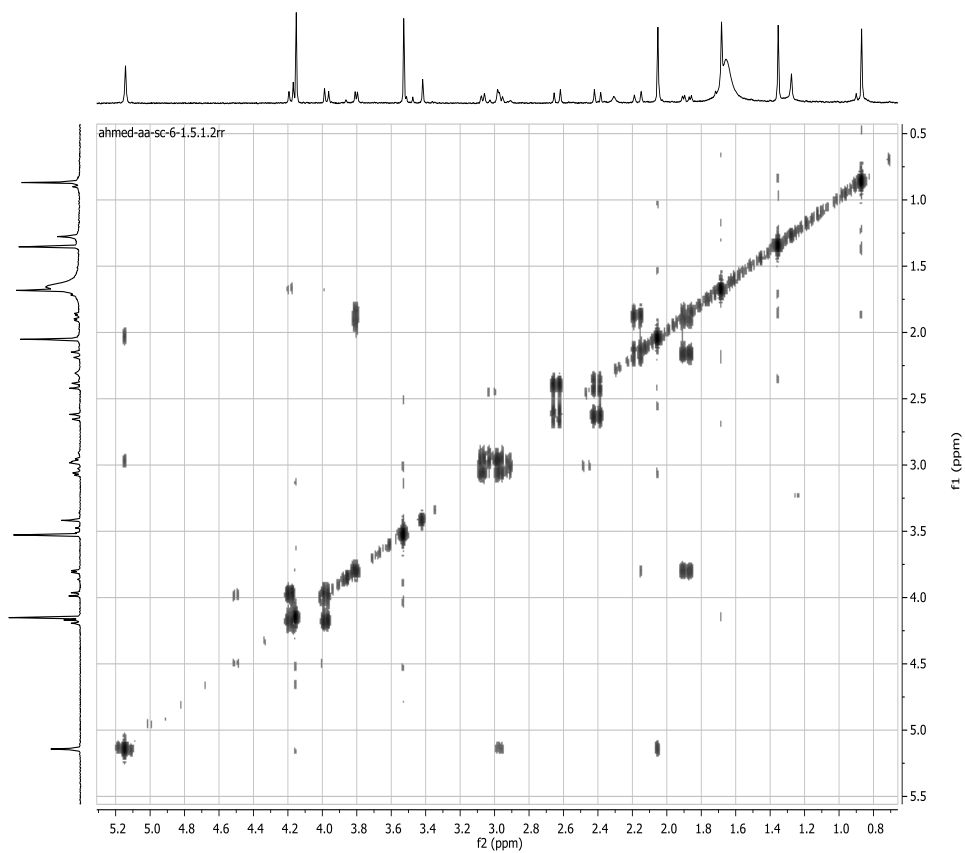

**S5. COSY spectrum of compound 1**

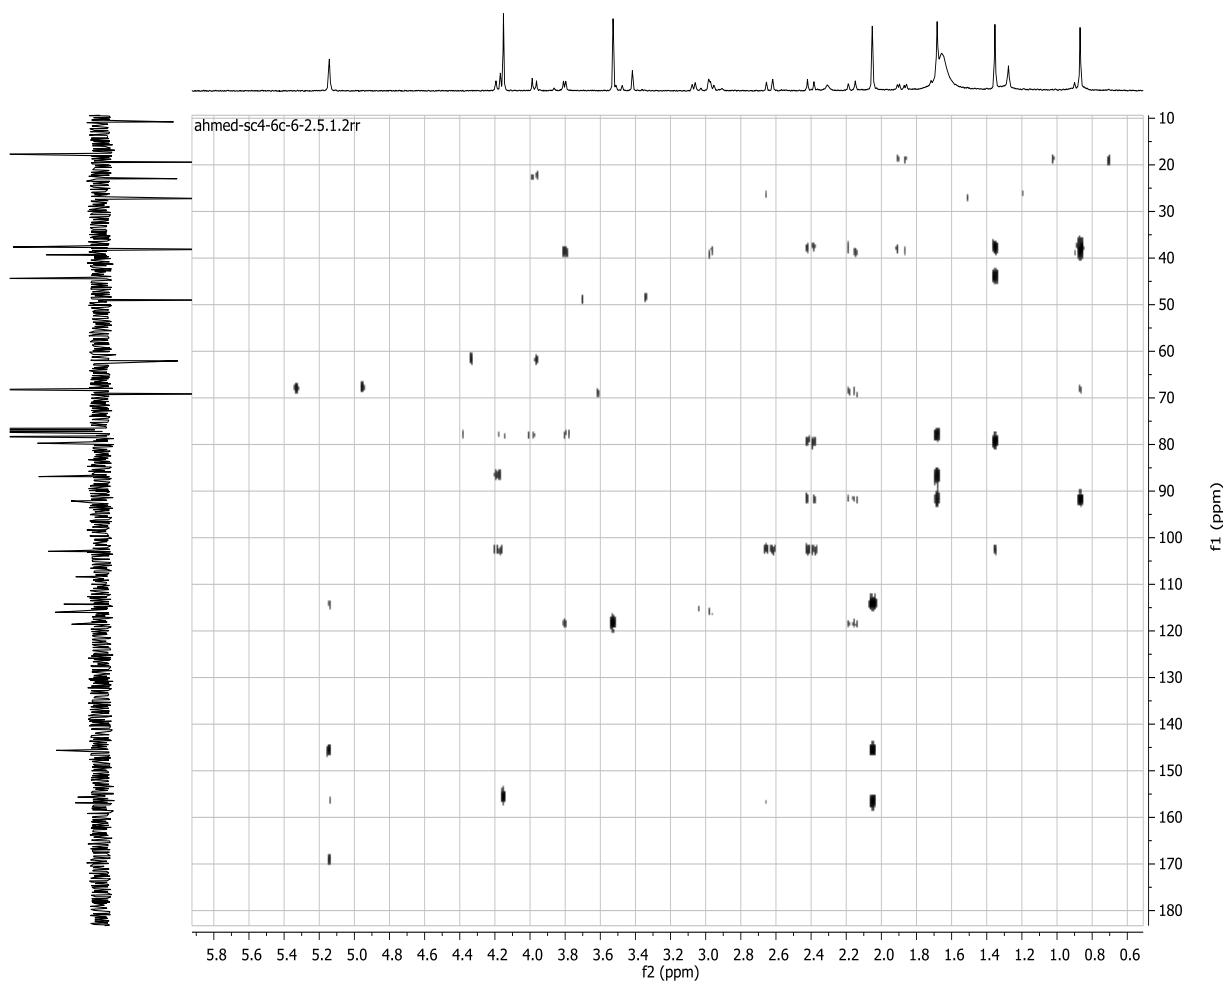

**S6. HMBC spectrum of compound 1**

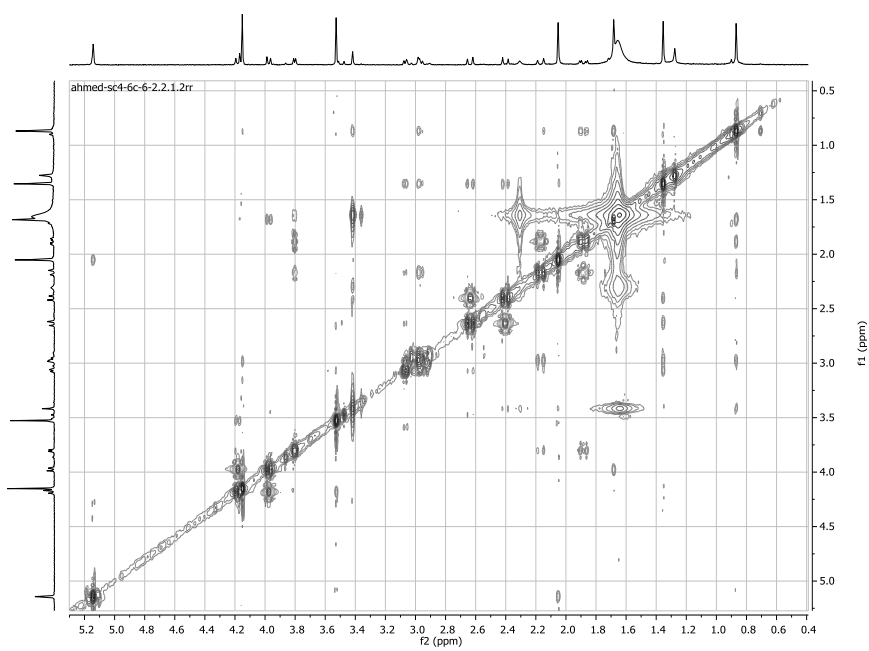

**S7. NOESY NMR spectrum of compound 1**

Event#: 1 Q3 Scan(E+) Ret. Time: [11.12] Scan#: [1649]

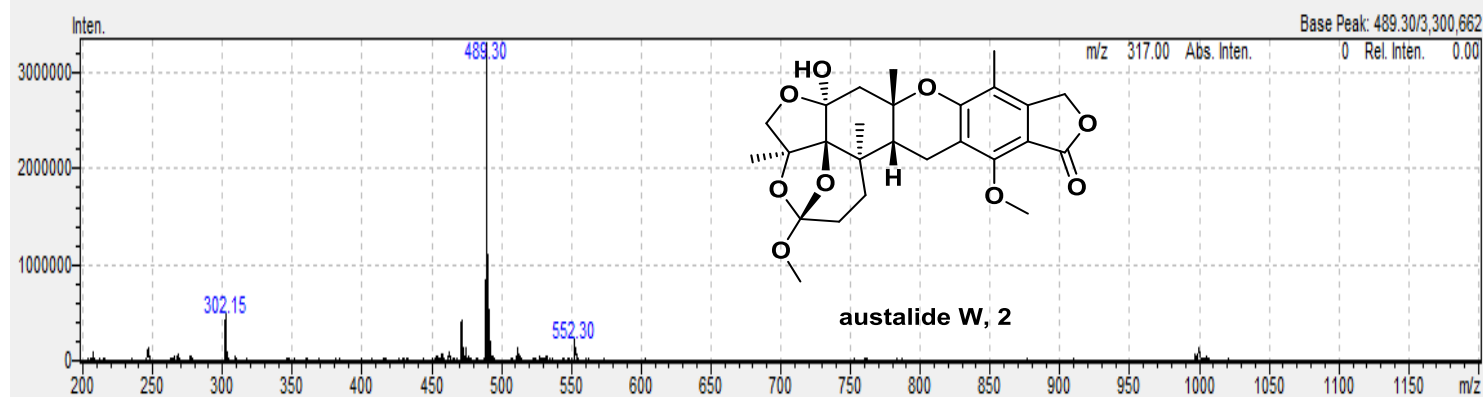

Event#: 2 Q3 Scan(E-) Ret. Time: [11.13] Scan#: [1650]

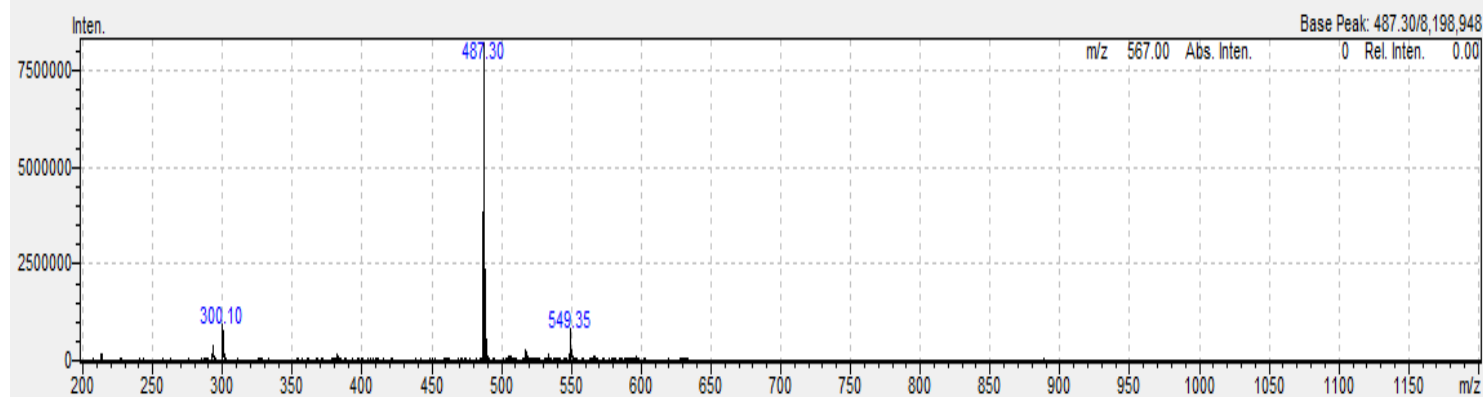

**S8. +/- ESIMS spectrum of Compound 2**

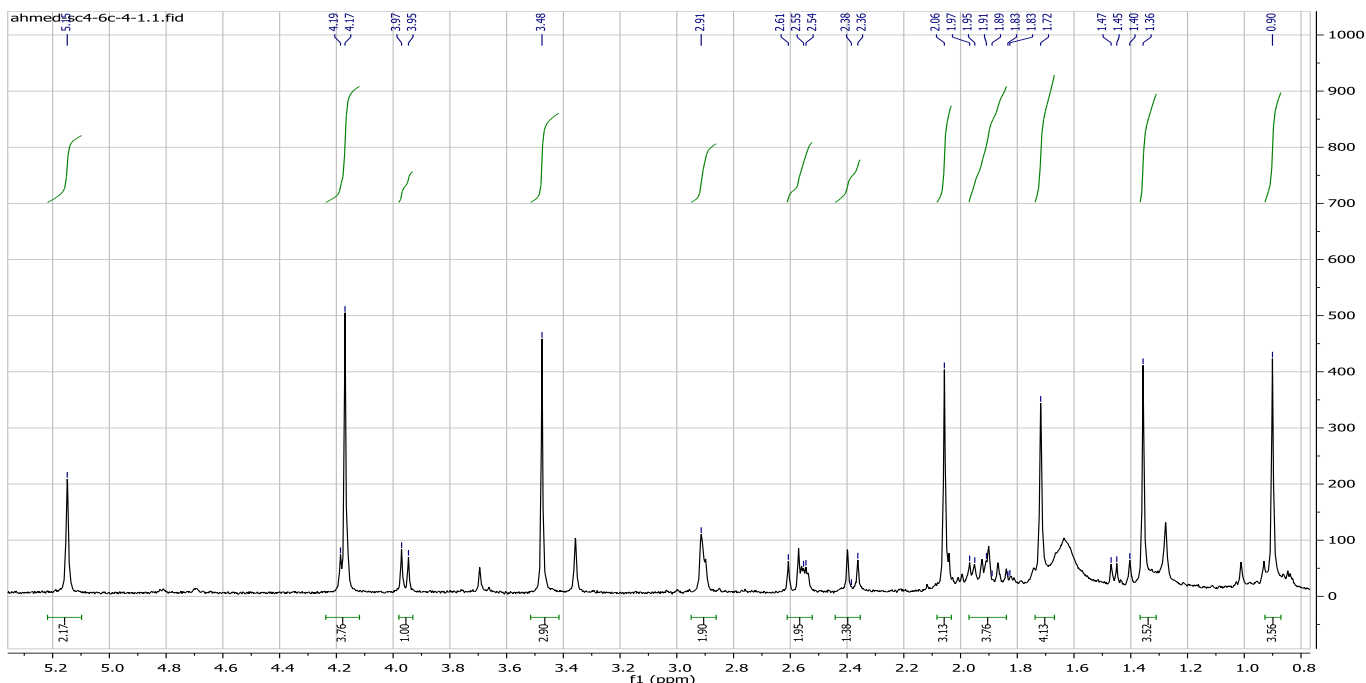

**S9. <sup>1</sup>H NMR spectrum of compound 2 (CDCl<sub>3</sub>)**

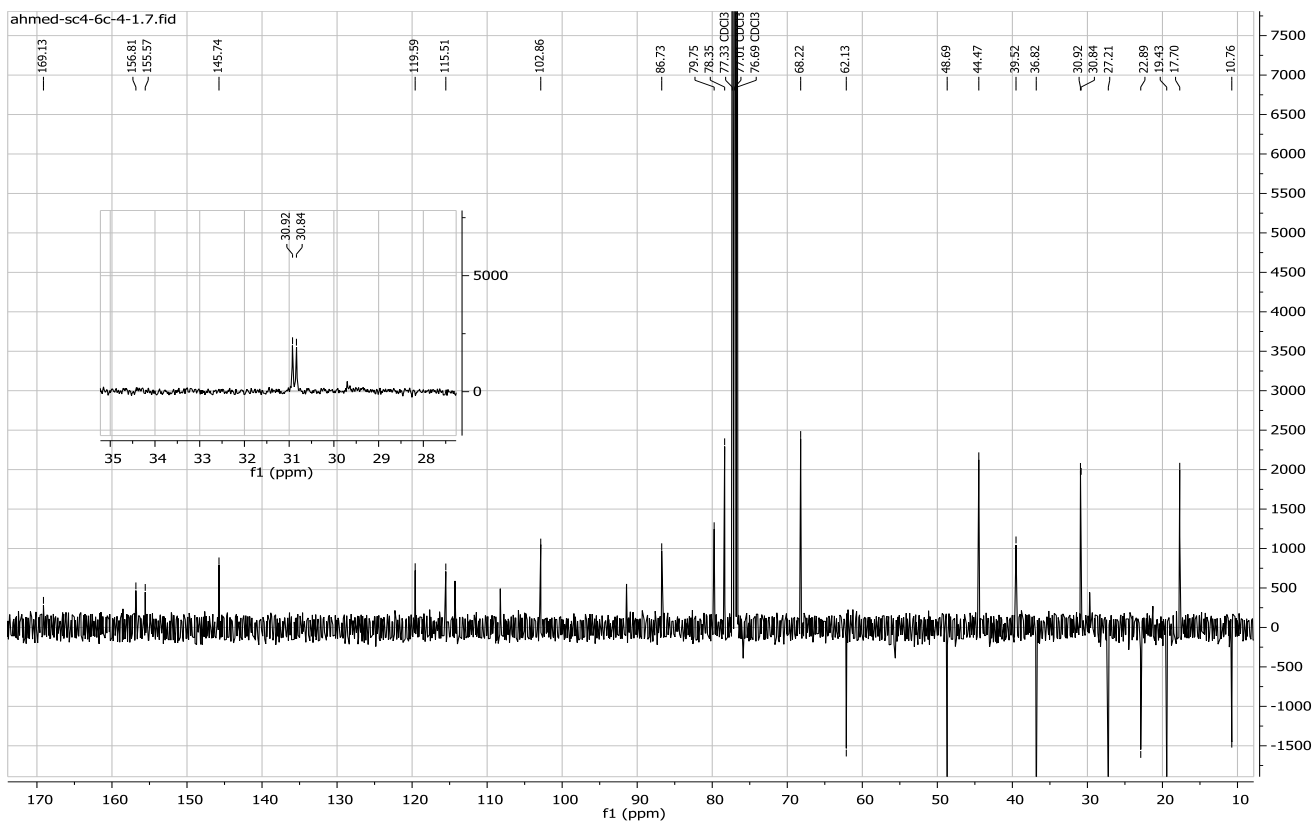

S10. APT NMR spectrum of compound 2

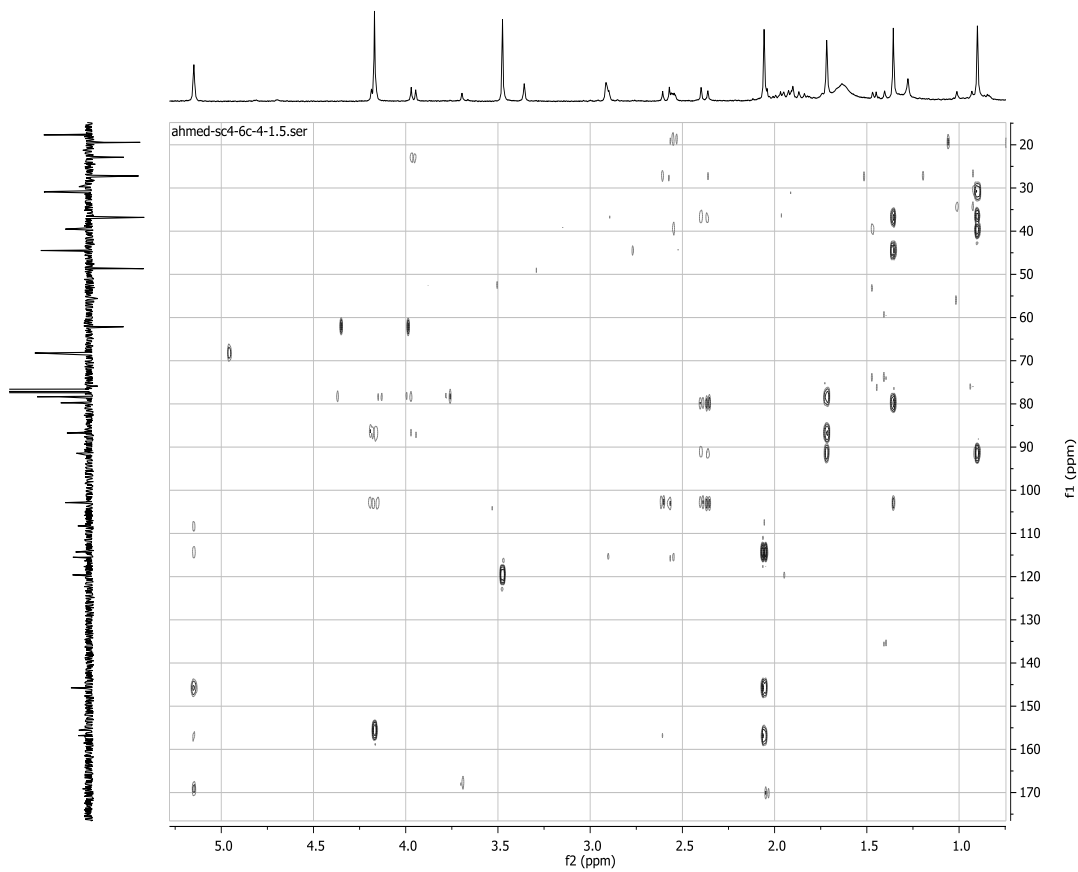

S11. HMBC spectrum of compound 2

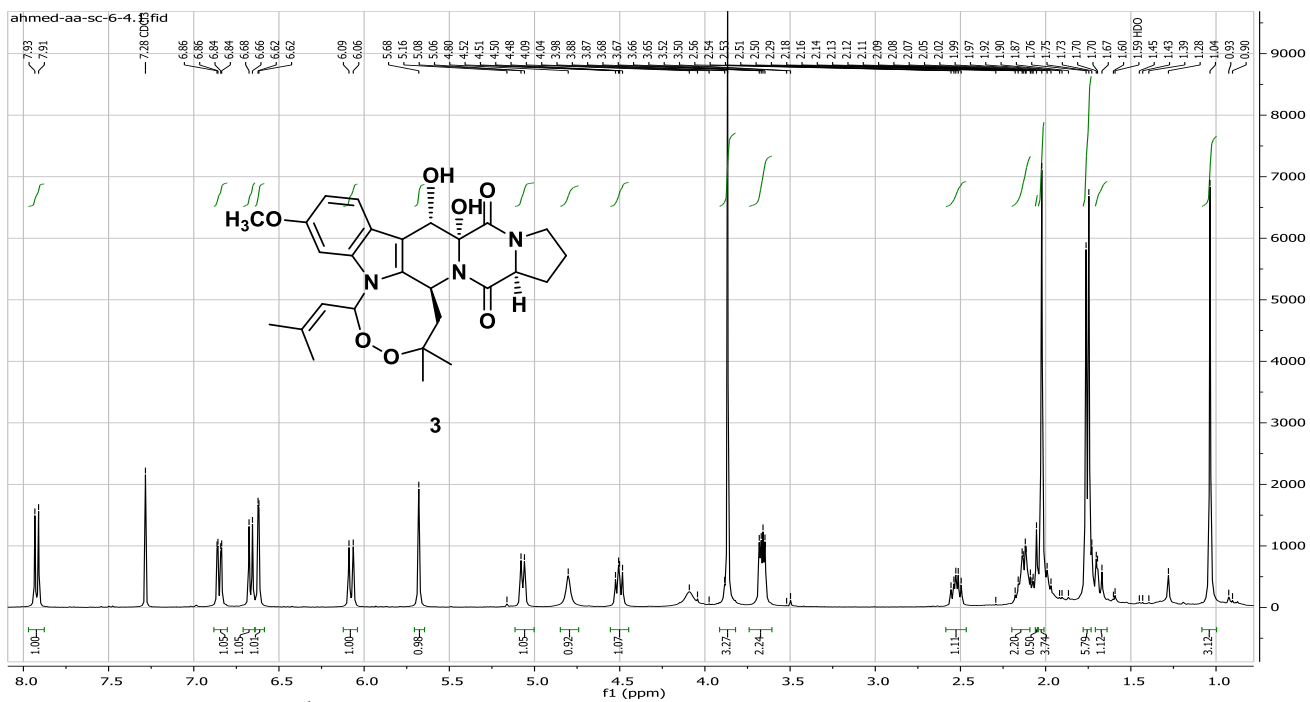

S12. <sup>1</sup>H NMR spectrum of compound 3 (CDCl<sub>3</sub>)

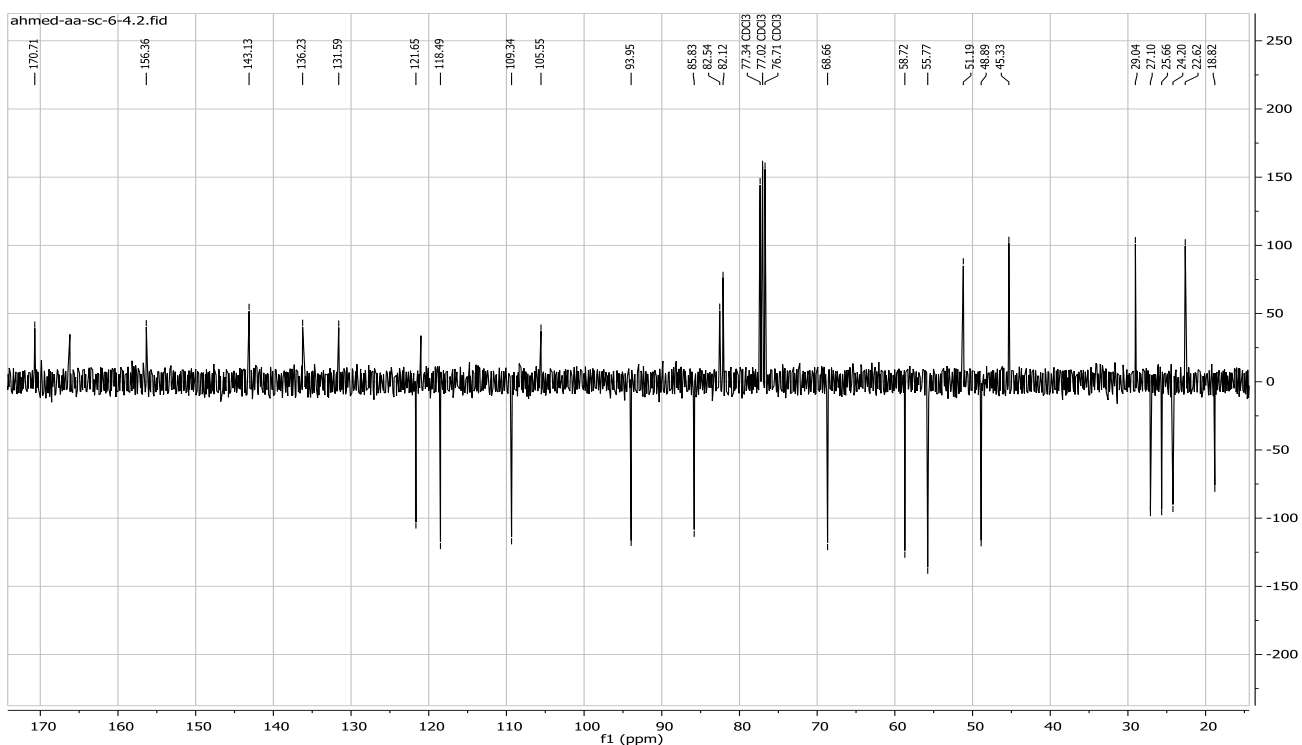

S13. APT NMR spectrum of compound 3



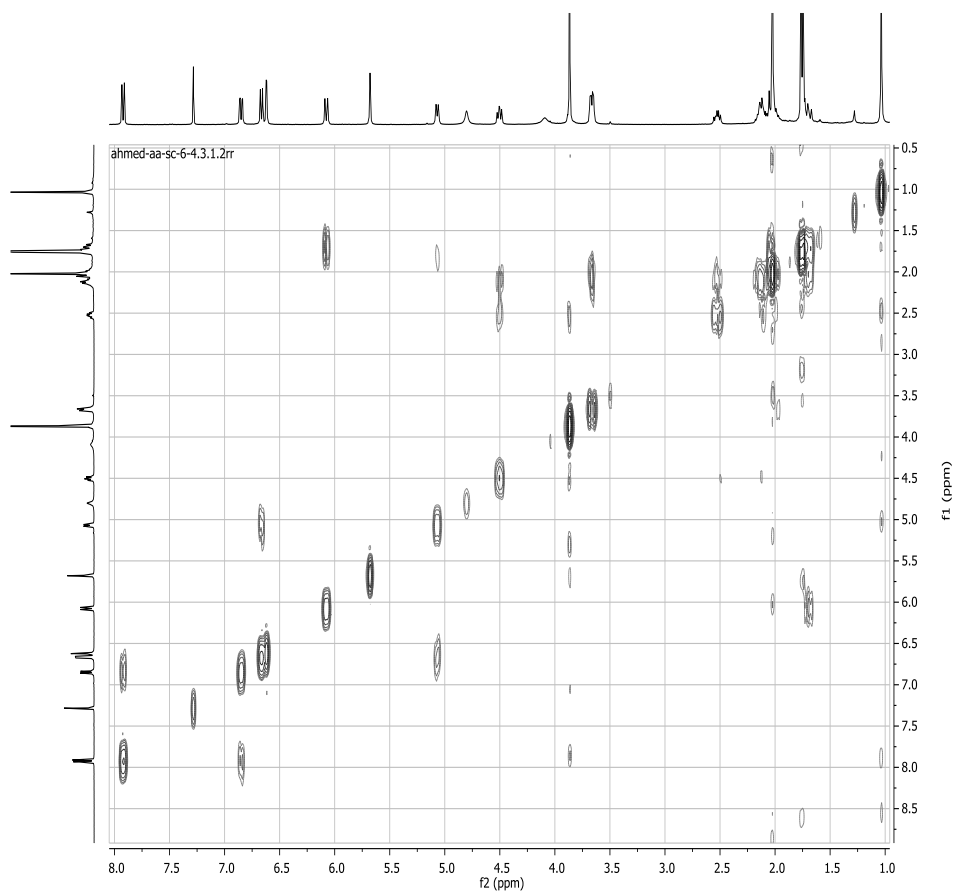

**S14.COSY spectrum of compound 3**

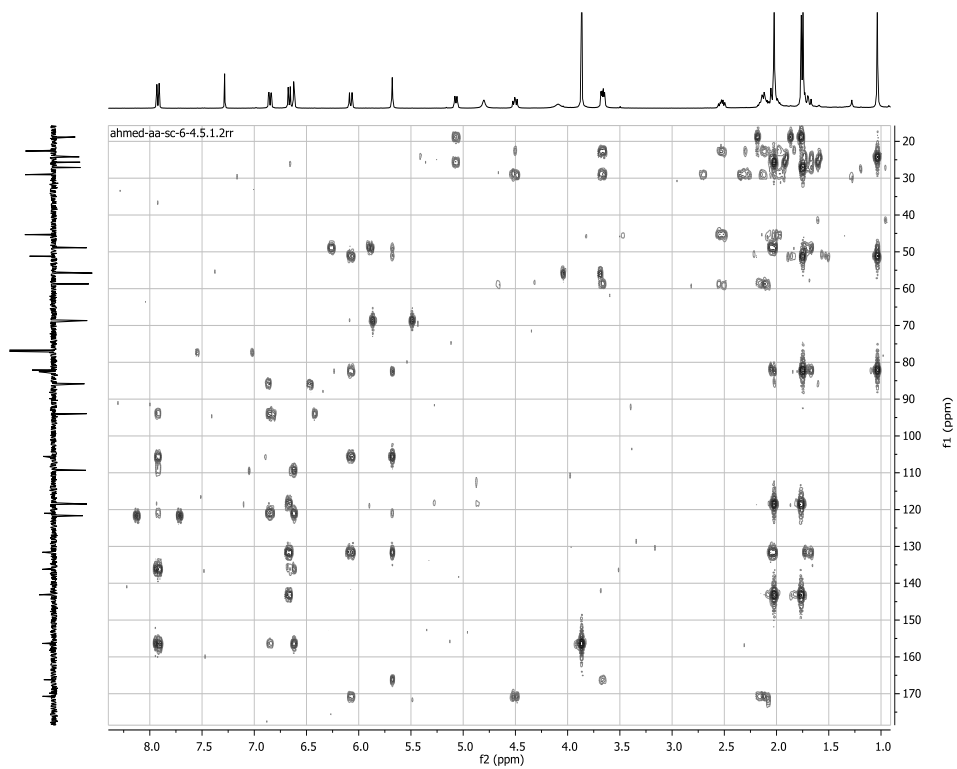

**S15. HMBC spectrum of compound 3**

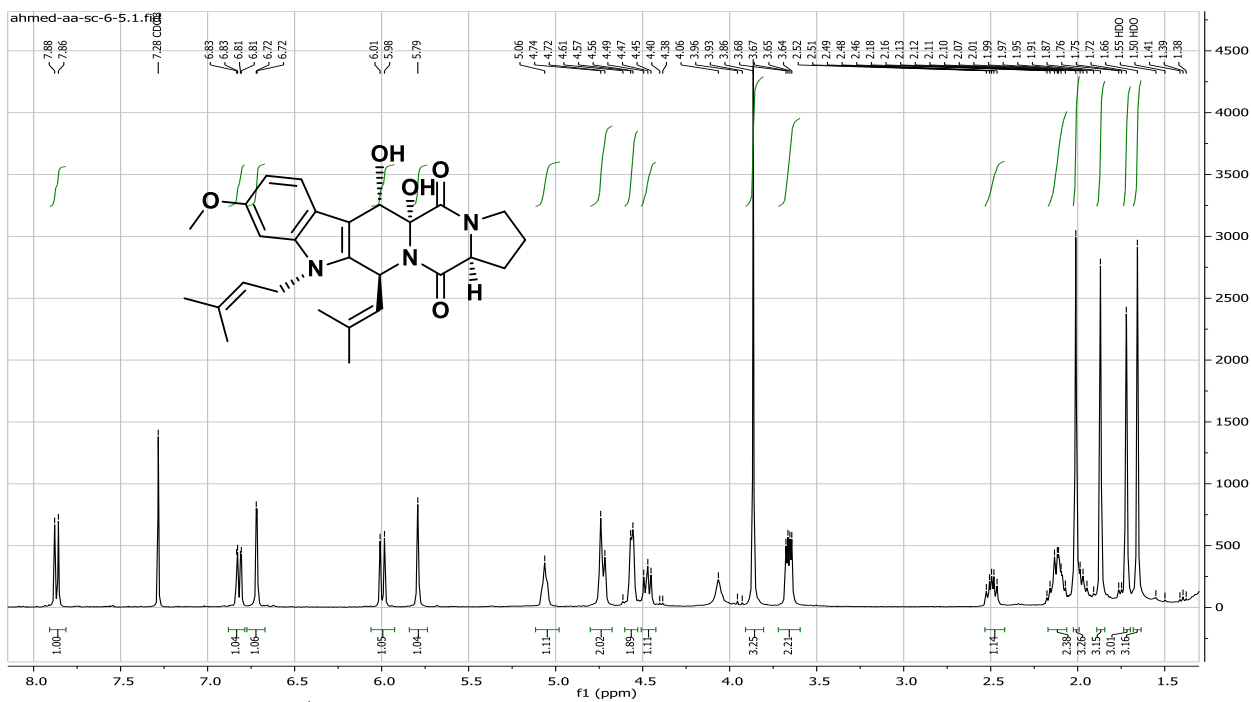

S16. <sup>1</sup>H NMR spectrum of compound 4 (CDCl<sub>3</sub>)

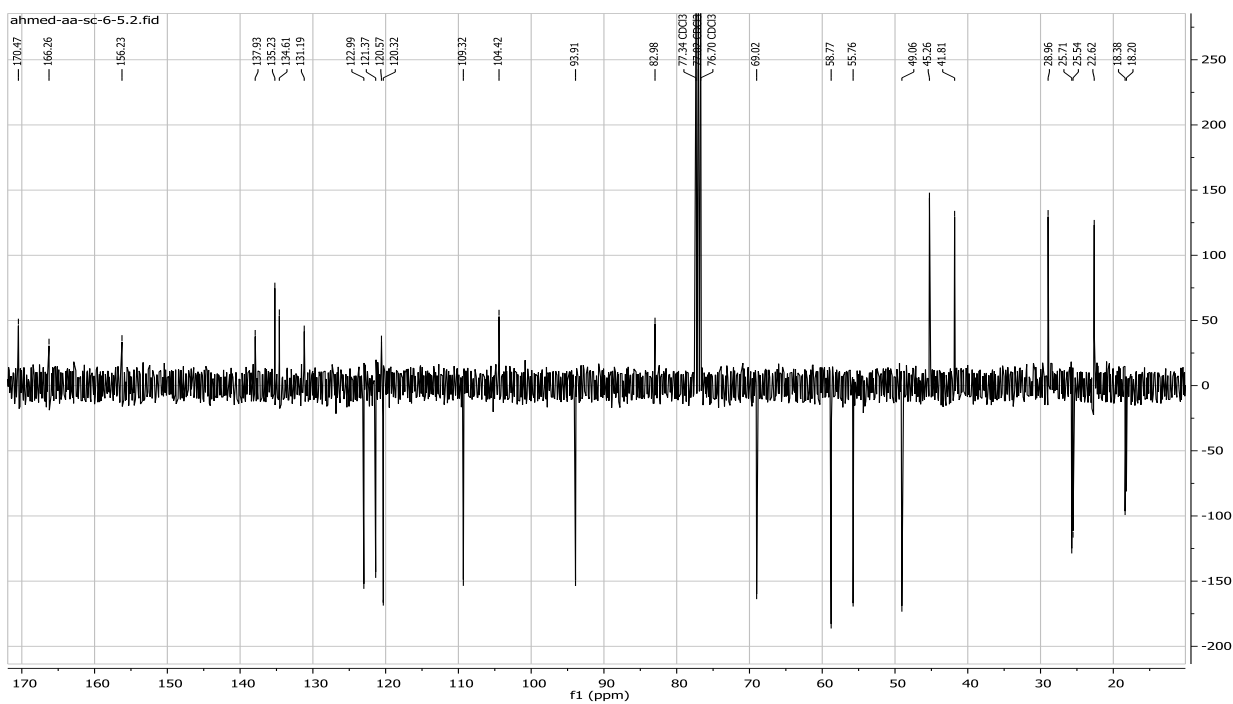

S17. APT NMR spectrum of compound 4

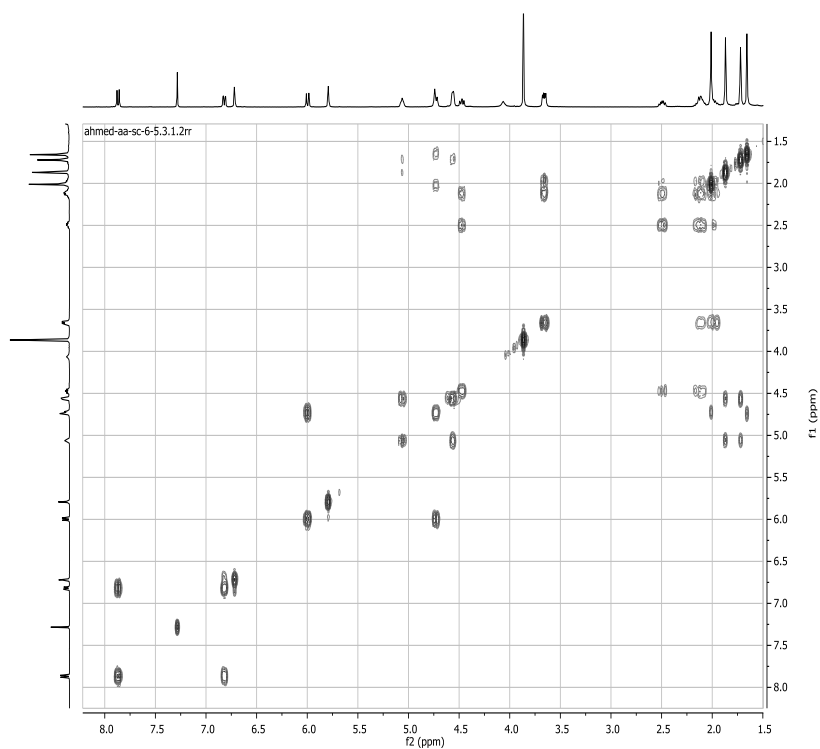

**S18.COSY spectrum of compound 4**

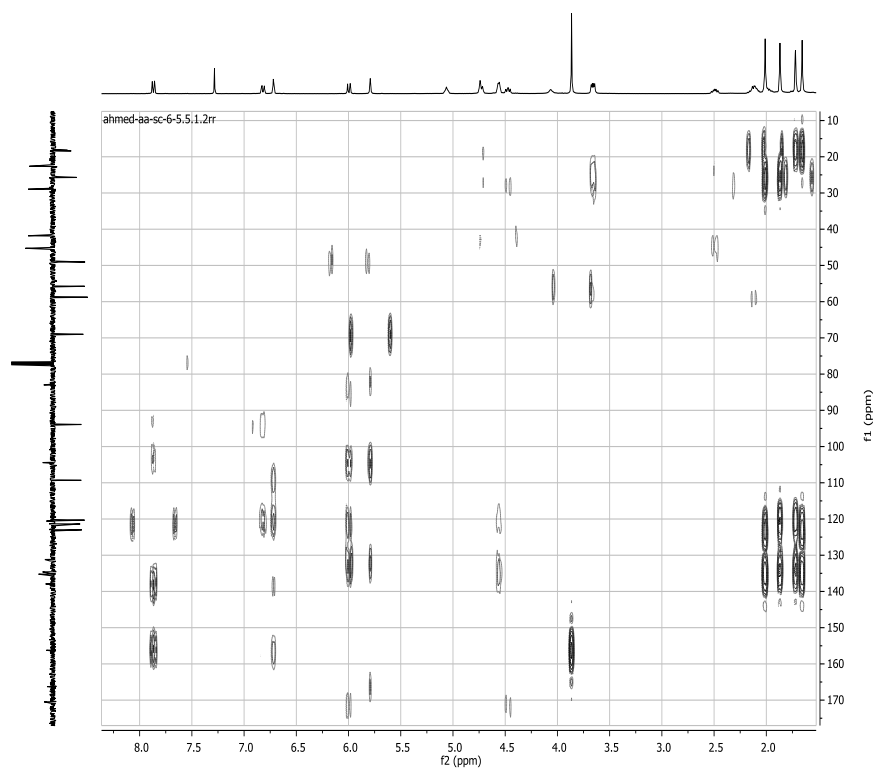

**S19. HMBC spectrum of compound 4**

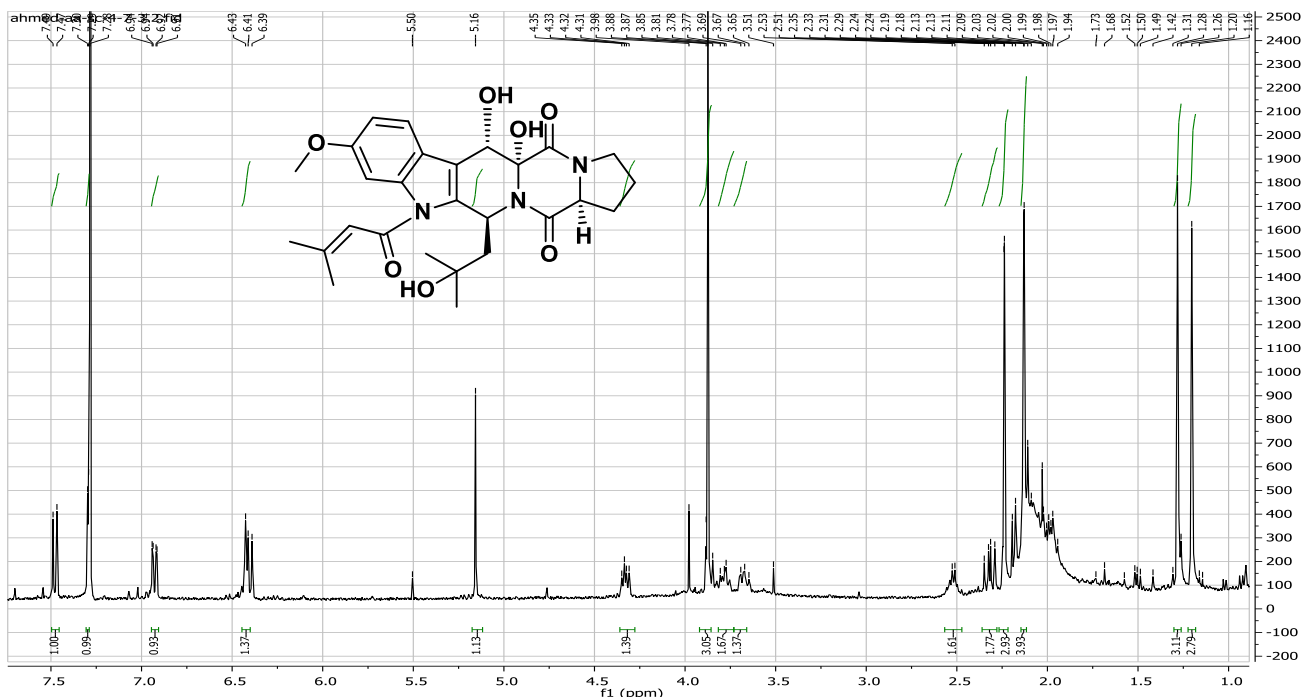

S20. <sup>1</sup>H NMR spectrum of compound 5 (CDCl<sub>3</sub>)

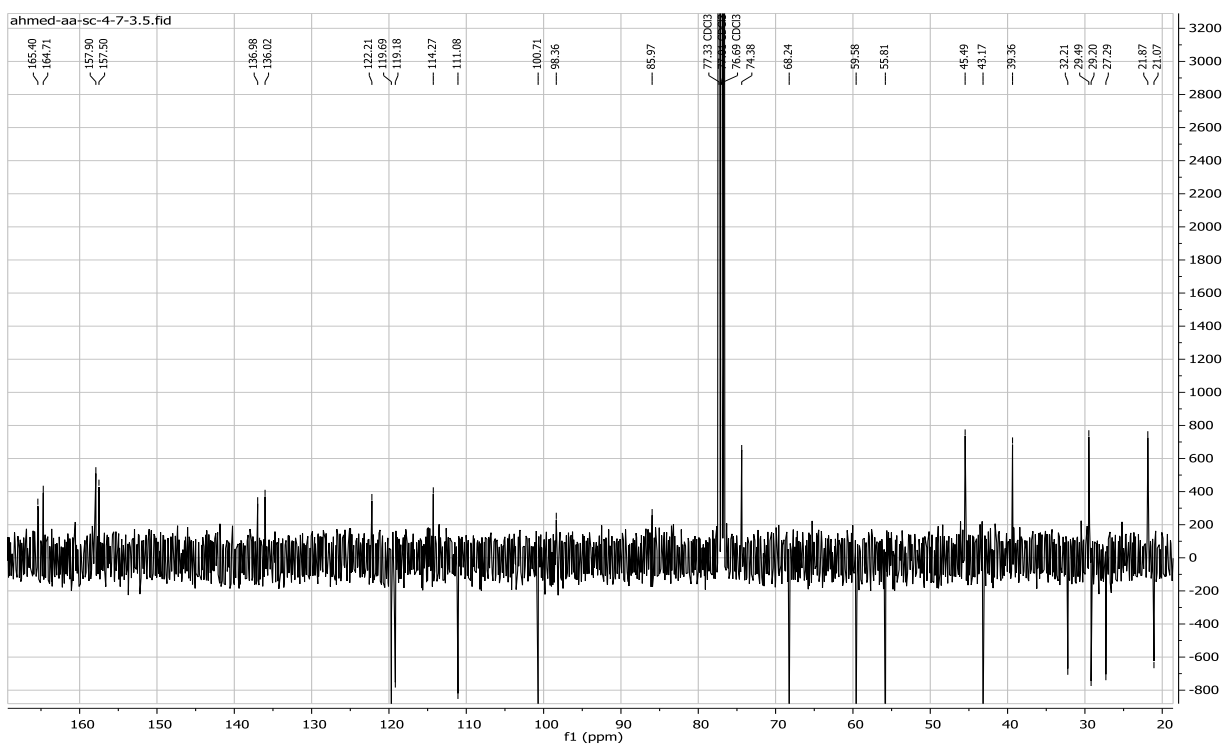

S21. APT NMR spectrum of compound 5

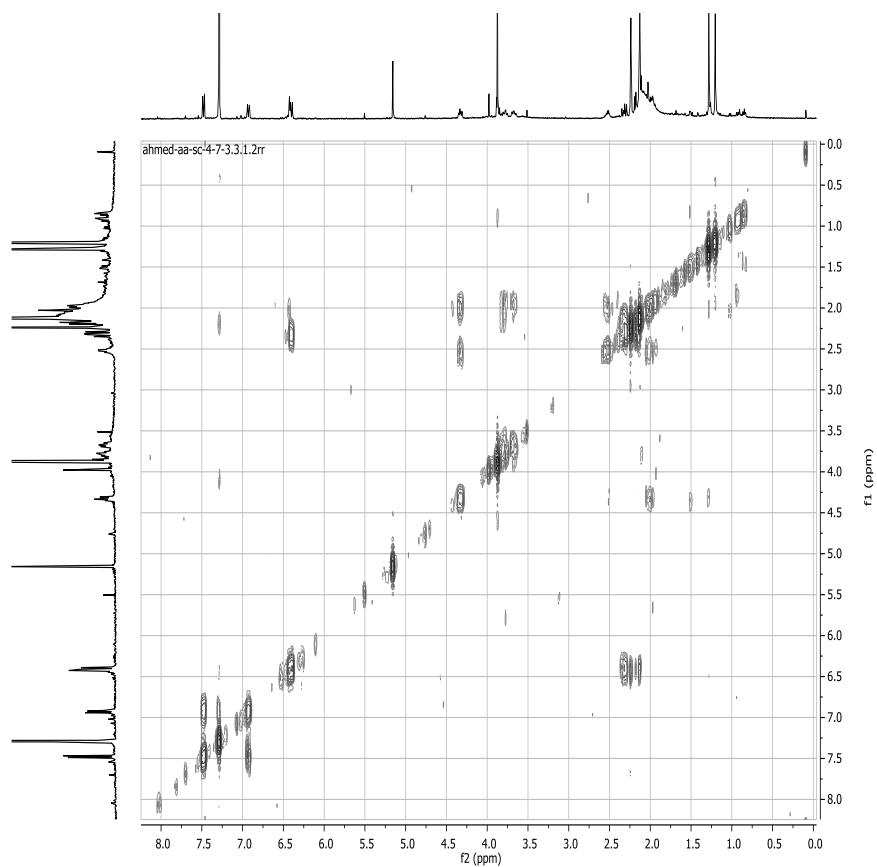

**S22. COSY spectrum of compound 5**

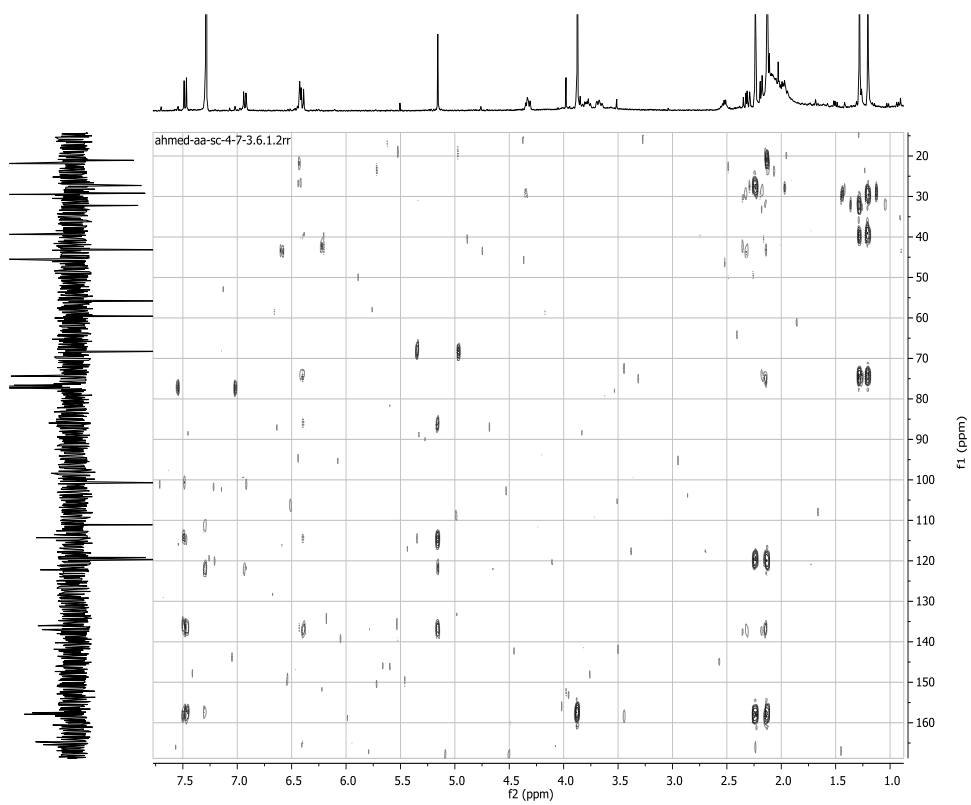

**S23. HMBC spectrum of compound 5**

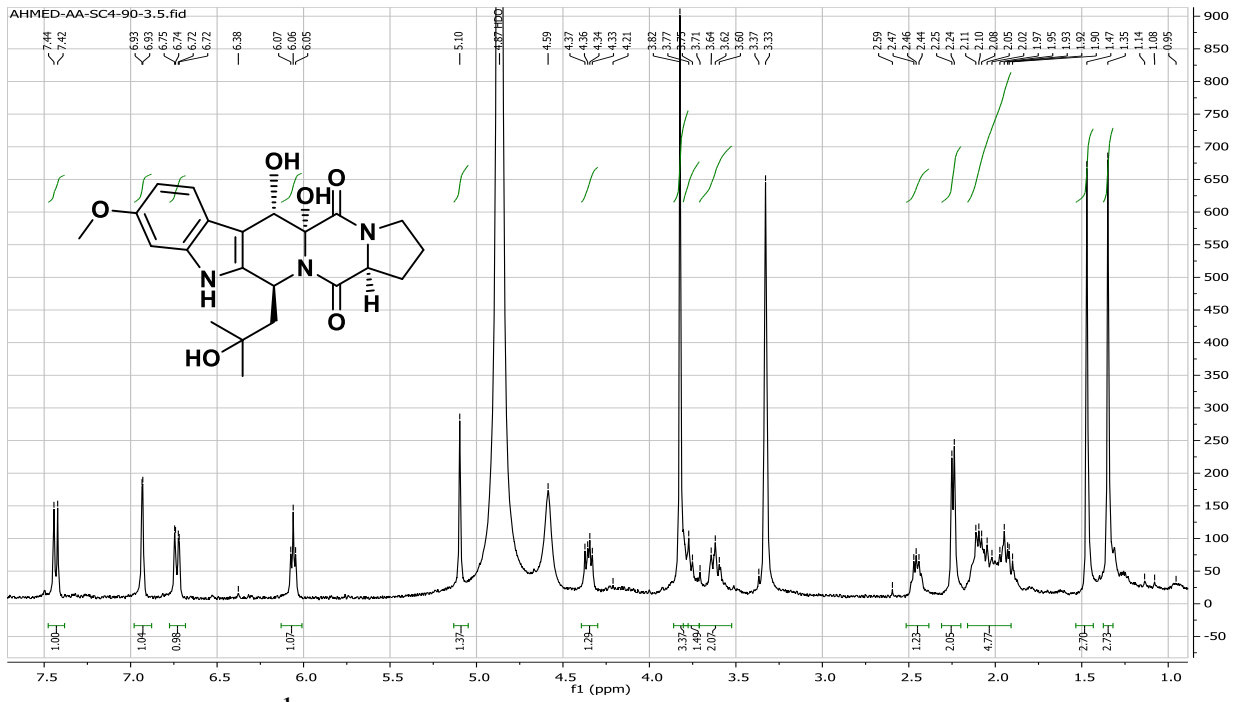

S24.  $^1\text{H}$  NMR spectrum of compound 6 ( $\text{CD}_3\text{OD}$ )

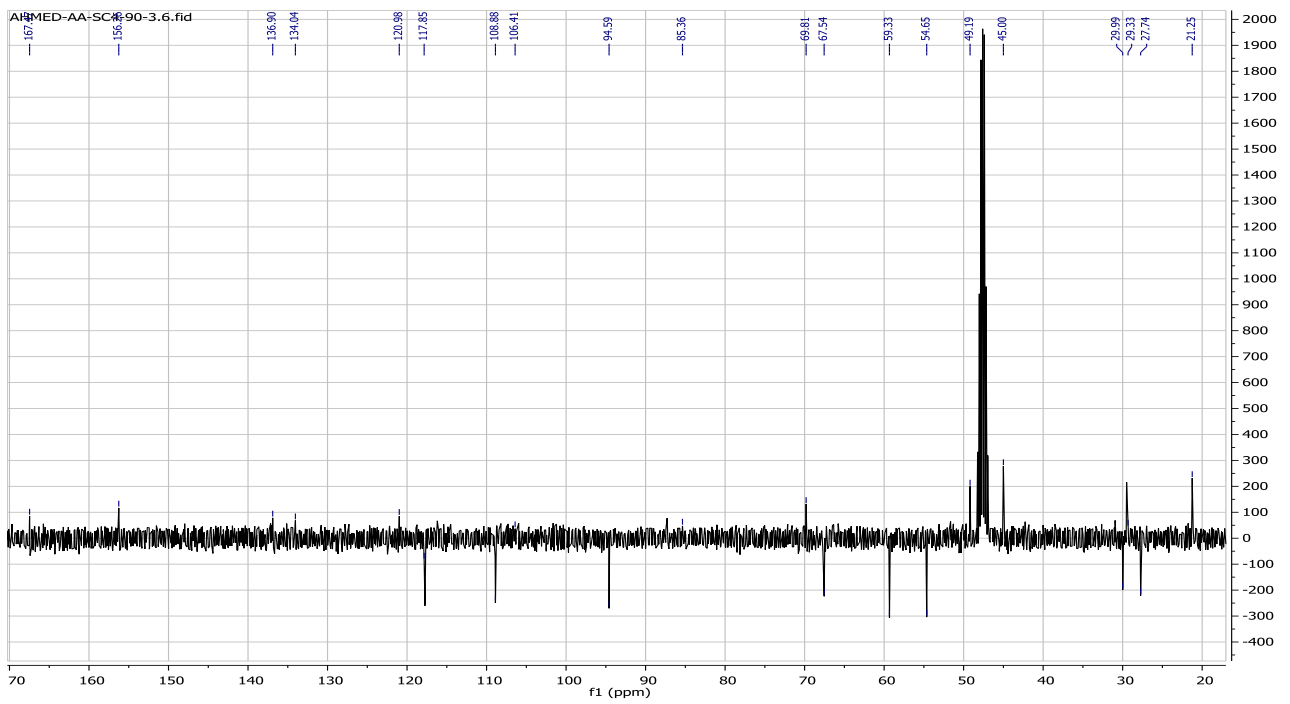

S25. APT spectrum of compound 6

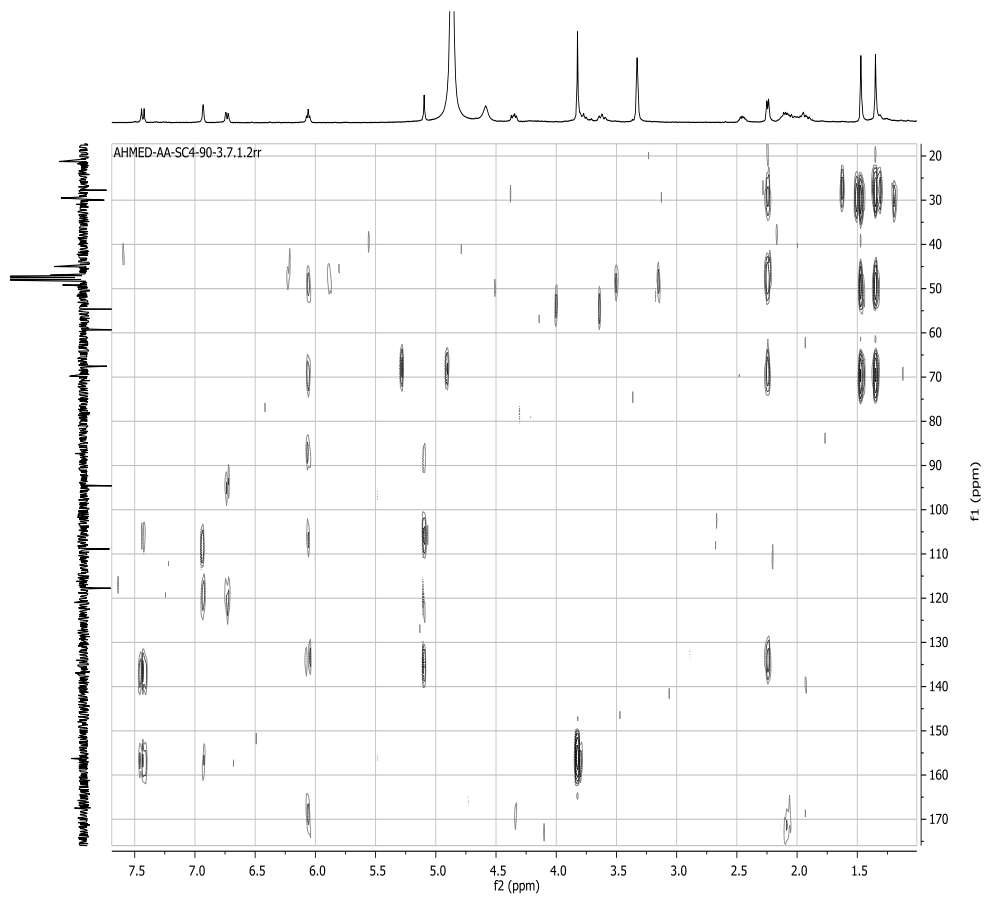

**S27. HMBC spectrum of compound 6**

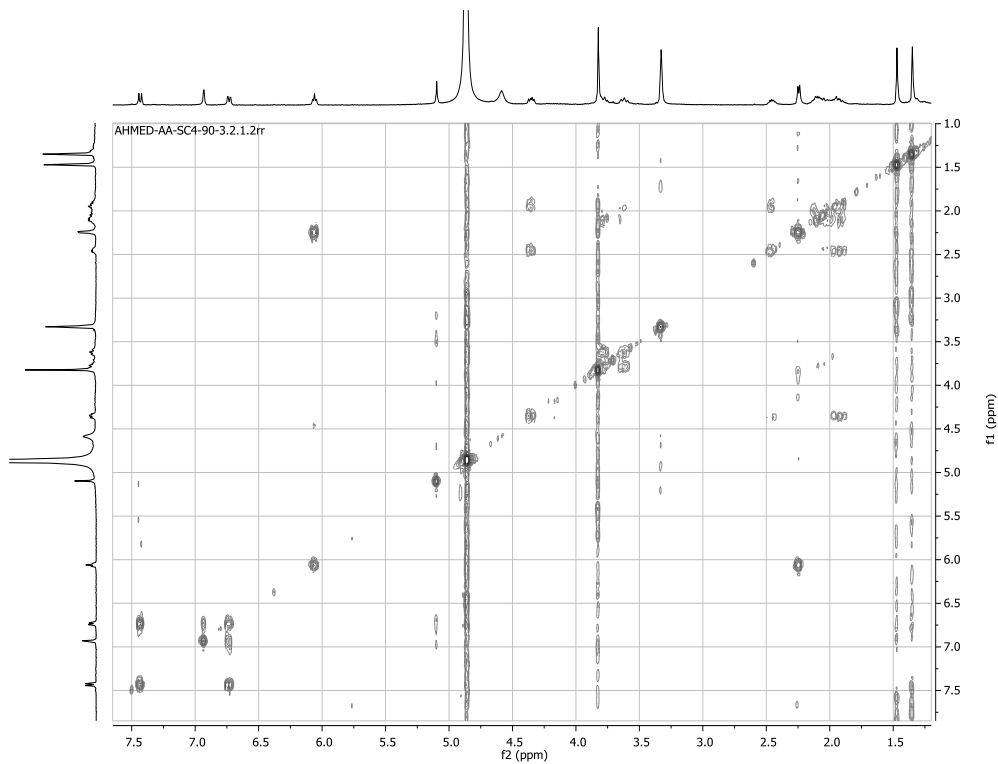

**S28. COSY spectrum of compound 6**

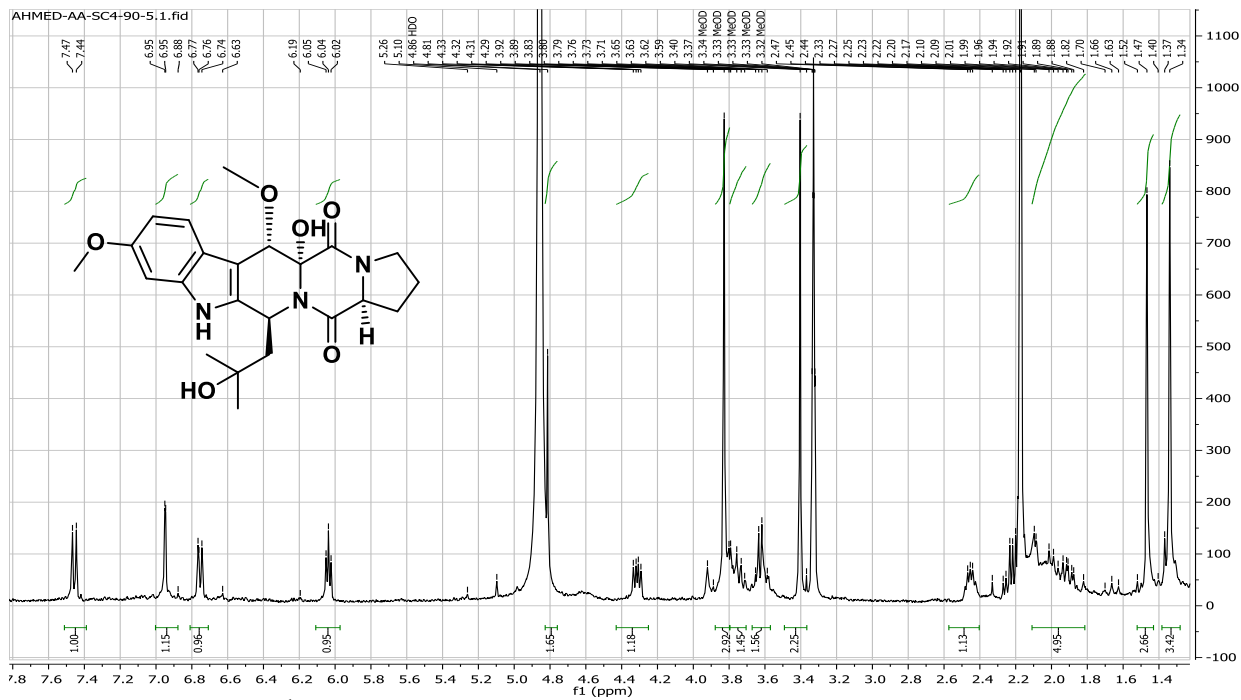

S29. <sup>1</sup>H NMR spectrum of compound 7 (CD<sub>3</sub>OD)

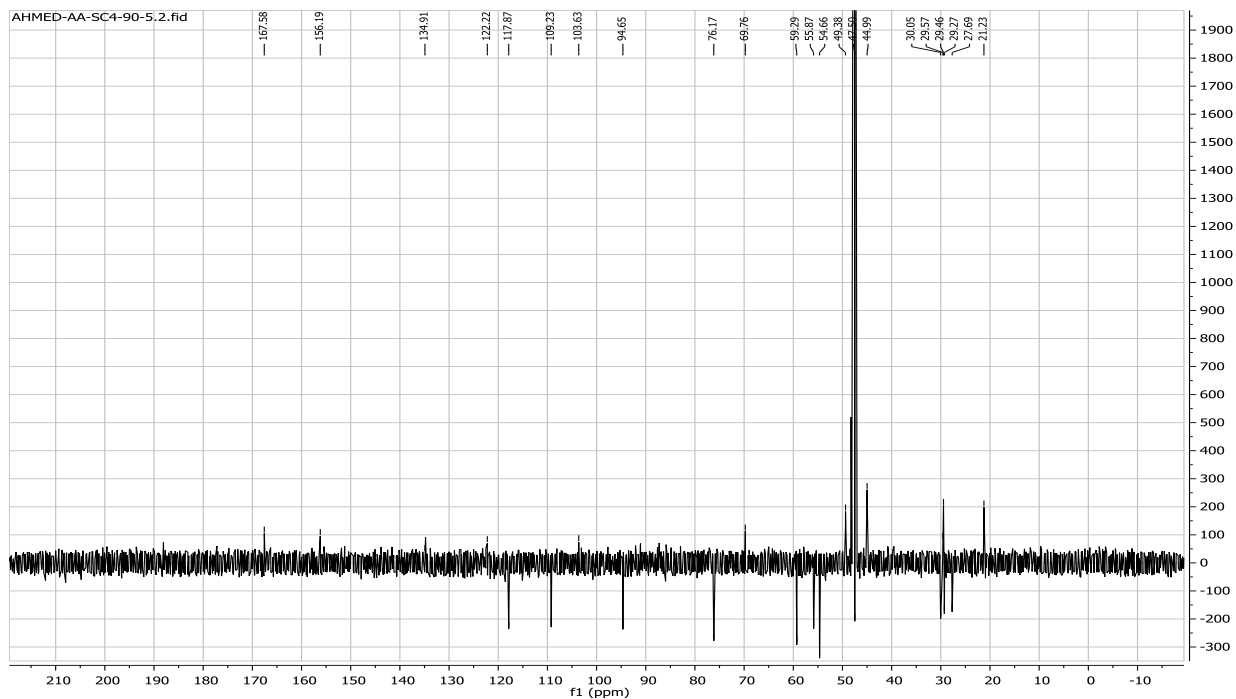

S30. APT NMR spectrum of compound 7



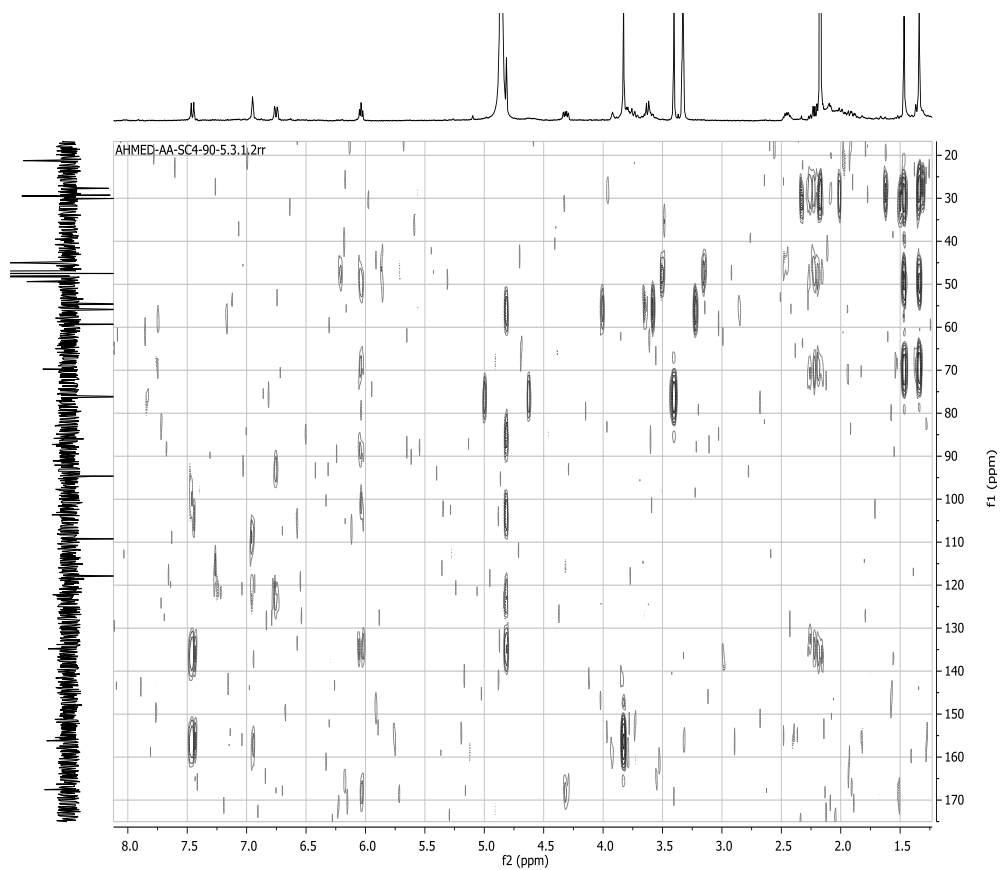

**S31. HMBC spectrum of compound 7**

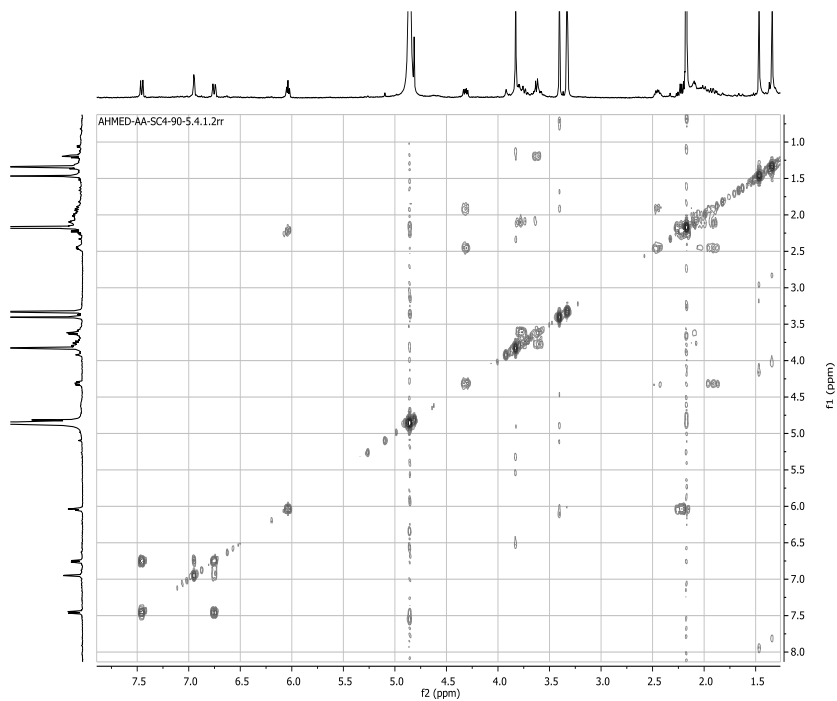

**S32. COSY spectrum of compound 7**

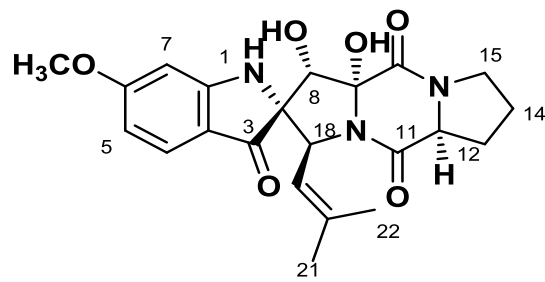

**Compound 8**

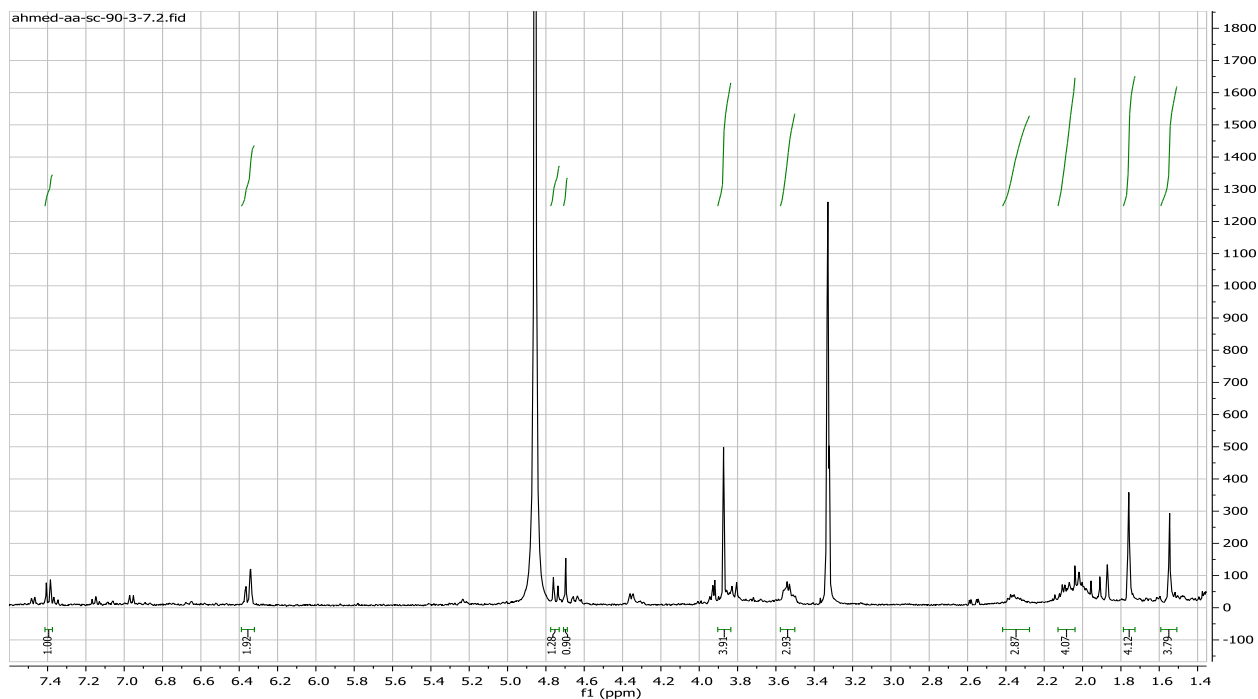

**S33. <sup>1</sup>H NMR spectrum of compound 8 (CD<sub>3</sub>OD)**

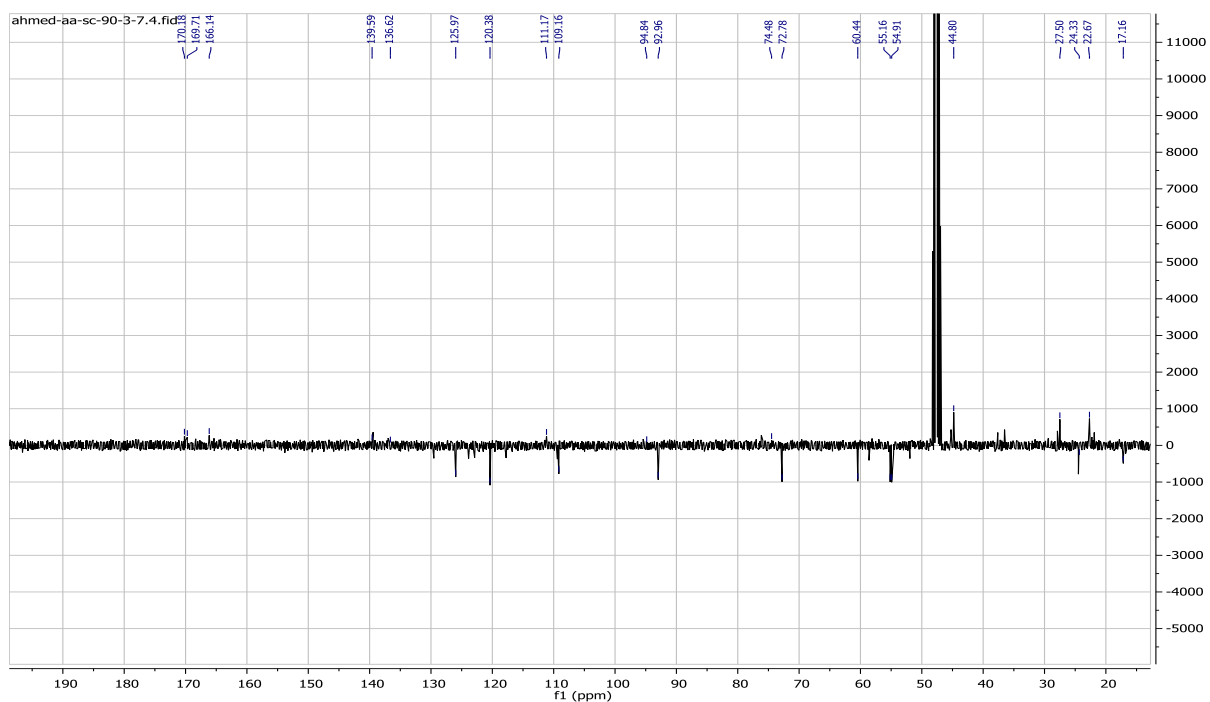

**S34. APT NMR spectrum of compound 8**

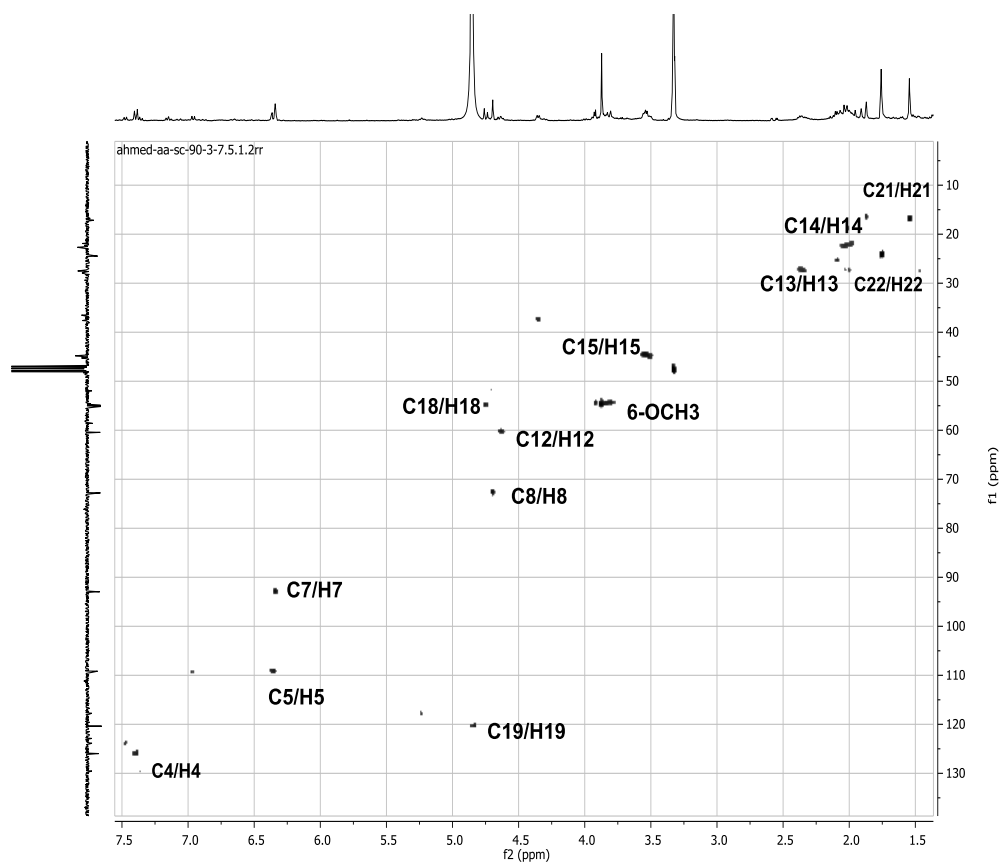

S35. HSQC NMR spectrum of compound 8

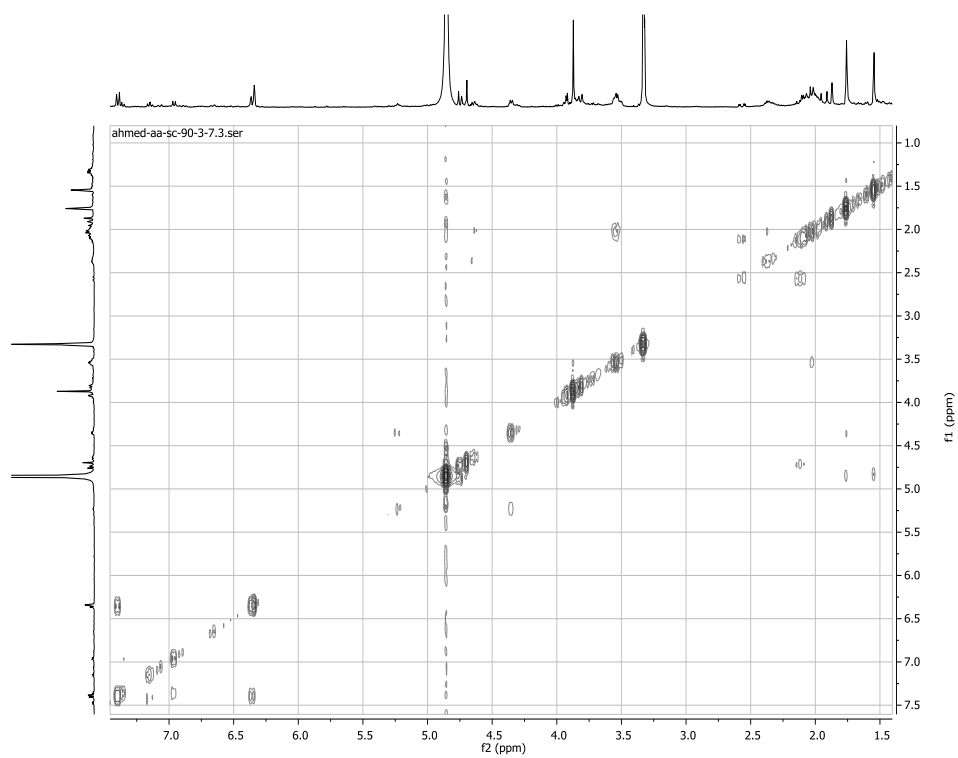

S36. COSY NMR spectrum of compound 8

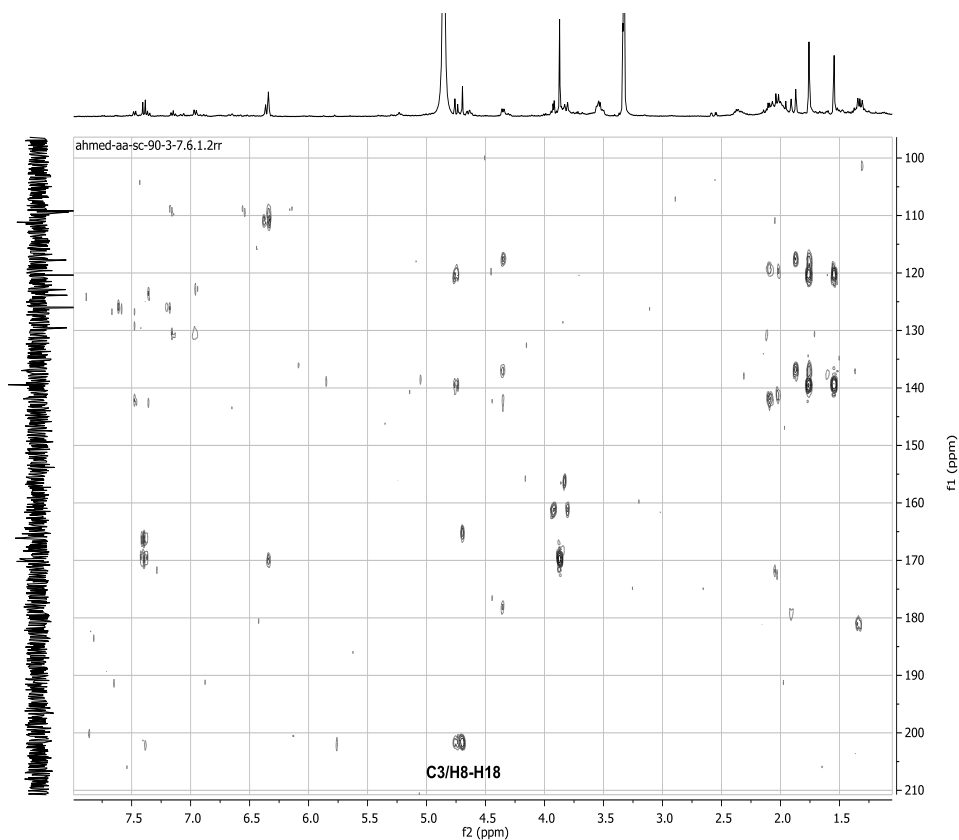

**S37. HMBC NMR spectrum of compound 8**

Event#: 1 Q3 Scan(E+) Ret. Time: [6.98] Scan#: [1035]

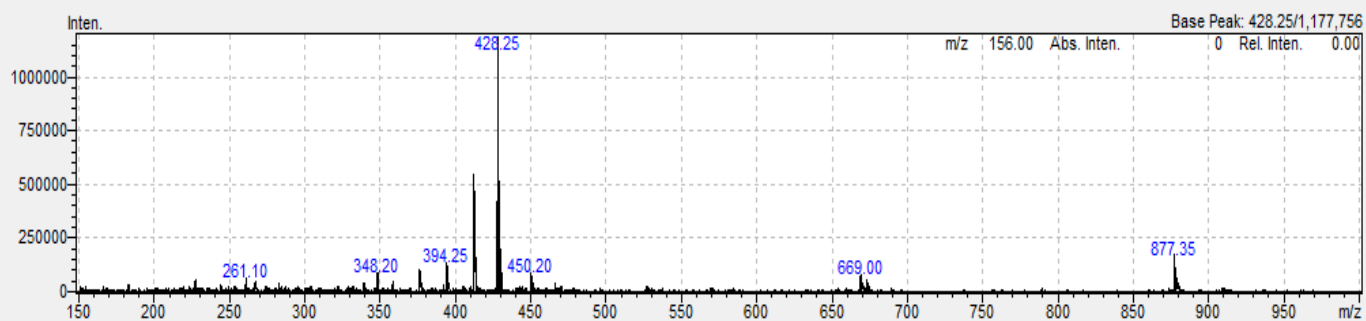

Event#: 2 Q3 Scan(E-) Ret. Time: [6.99] Scan#: [1036]

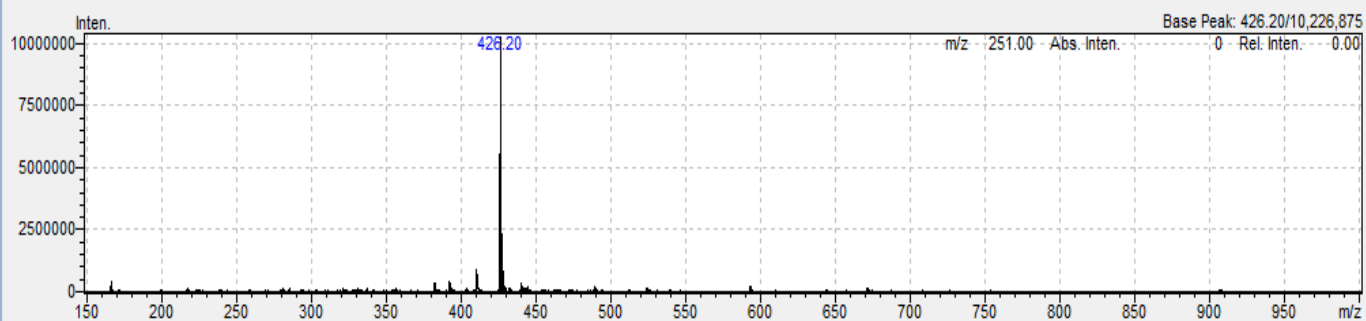

**S38. +/- ESIMS spectrum of Compound 8**
